# Supplementary material
Source: Springer Nature journal article supplement (https://www.springermedizin.de/resource/supplementary/12889_2012_5125_MOESM5_ESM.pdf/9494688)

**Cat 1, CFR = 0.1%**

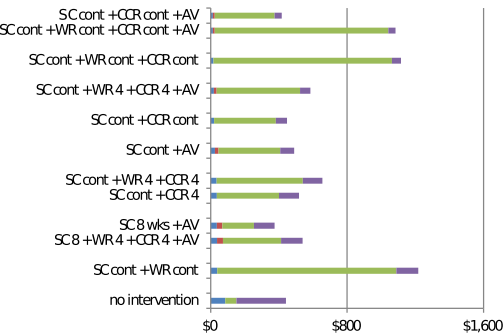

**Cat 2, CFR = 0.25%**

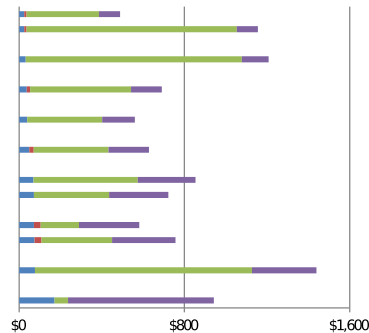

**Cat 3, CFR = 0.75%**

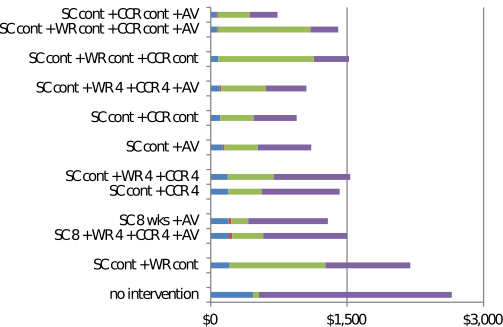

**Cat 4, CFR = 1.5%**

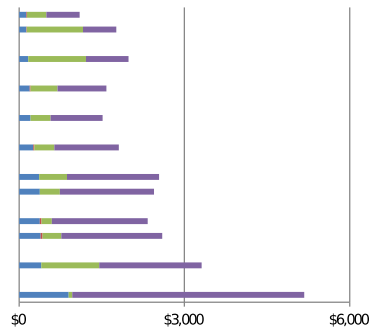

**Cat 5, CFR = 2.5%**

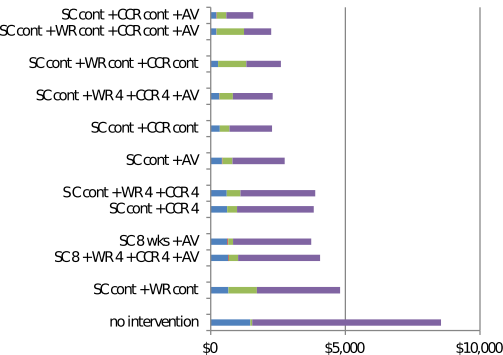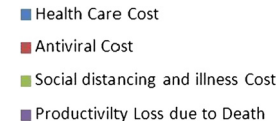

Supplement: MOESM5 [file 9494688]
